# Supplementary material for: Long range electronic phase separation in CaFe3O5
Source: PubMed Central journal article supplement (PMC6065443; doi:10.1038/s41467-018-05363-6), 2018-07-30
Supplement: 41467_2018_5363_MOESM1_ESM.pdf [file 41467_2018_5363_MOESM1_ESM.pdf]

# **Long range electronic phase separation in $\text{CaFe}_3\text{O}_5$**

Ka. H. Hong, Angel M. Arevalo-Lopez, James Cumby, Clemens Ritter and J. Paul. Attfield

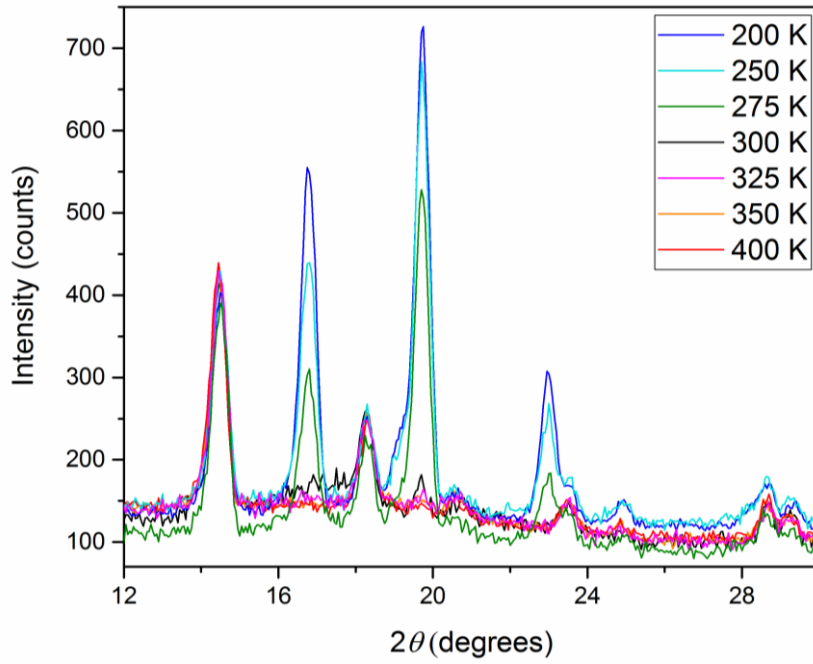

**Supplementary Figure 1. Low angle region of powder neutron diffraction patterns of  $\text{CaFe}_3\text{O}_5$ .** The thermal evolution of the magnetic scattering shows little change on cooling from 400 to 325 K, but some diffuse scatter is seen at 300 K, just below the onset of spin order at  $T_M = 302$  K.

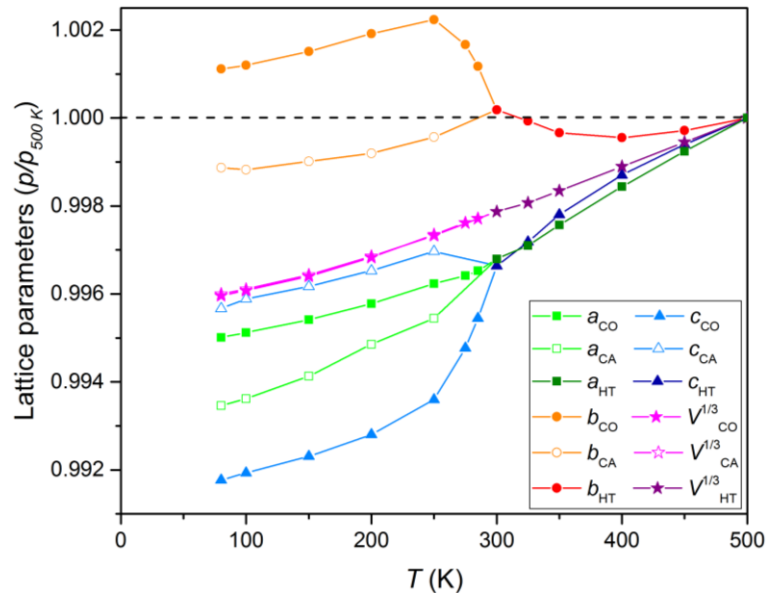

**Supplementary Figure 2. Lattice parameters of  $\text{CaFe}_3\text{O}_5$ .** Changes in the lattice parameters relative to 500 K values obtained from PSXRD data ( $a_{500\text{ K}} = 3.039972(2)$ ,  $b_{500\text{ K}} = 10.016679(8)$  and  $c_{500\text{ K}} = 12.676256(10)$ ), showing similar variations to PND data in Fig. 4a.

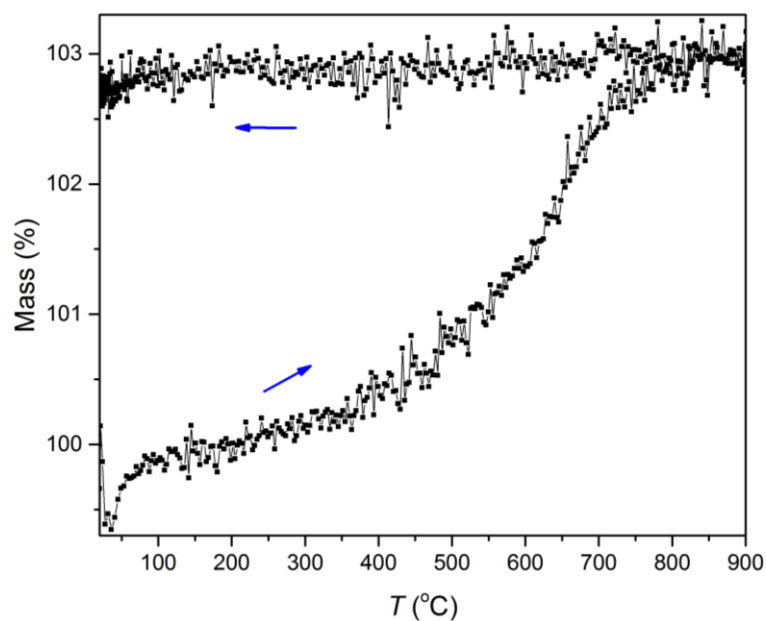

**Supplementary Figure 3. Thermogravimetric analysis of  $\text{CaFe}_3\text{O}_5$ .** The plot shows the change in percentage mass while heating the  $\text{CaFe}_3\text{O}_5$  sample in air at  $10\text{ }^\circ\text{C min}^{-1}$  to  $900\text{ }^\circ\text{C}$  and then cooling at the same rate. Arrows indicate the direction of the measurement.

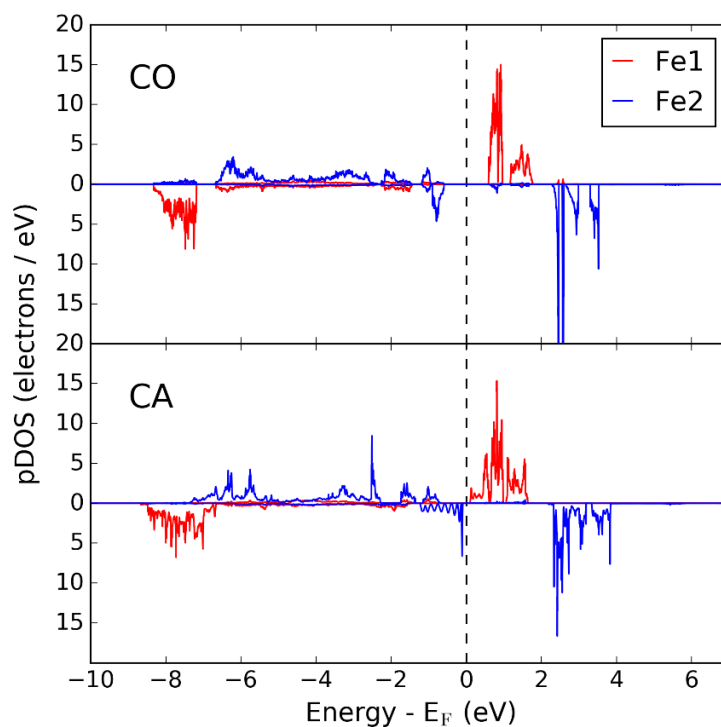

**Supplementary Figure 4. Electronic density of states for  $\text{CaFe}_3\text{O}_5$ .** Partial density of states (pDOS) for Fe1 and Fe2 d-orbitals (arbitrary spin direction chosen) for CO and CA phases, calculated with  $U = 3.4\text{ eV}$ . CO pDOS shows increased band mixing between Fe1 and Fe2 in the region around  $-8\text{ eV}$ , attributed to trimeron bonding.

**Supplementary Table 1.** Lattice parameters, atomic coordinates, and isotropic thermal displacements from neutron refinements in *Cmcm* space group of  $\text{CaFe}_3\text{O}_5$  HT phase at 500 K (upper values) and CO and CA phases at 4 K (lower values). Estimated standard deviations in independent variables are shown in parentheses.  $R$  factors are  $R_{\text{wp}} = 7.70$  and  $7.28\%$ , and  $R_{\text{p}} = 7.32$  and  $6.14\%$  at 500 K and 4 K, respectively.

| $a/\text{\AA}$ |            | $b/\text{\AA}$ |             | $c/\text{\AA}$ |              | Volume / $\text{\AA}^3$ |             |                        |           |                               |          |
|----------------|------------|----------------|-------------|----------------|--------------|-------------------------|-------------|------------------------|-----------|-------------------------------|----------|
| HT             |            | HT             |             | HT             |              | HT                      |             |                        |           |                               |          |
| CO             | CA         | CO             | CA          | CO             | CA           | CO                      |             | CA                     |           |                               |          |
| 3.03896(1)     |            | 10.01354(5)    |             | 12.67038(7)    |              | 385.569(3)              |             |                        |           |                               |          |
| 3.02425(3)     | 3.01944(3) | 10.02139(10)   | 9.99766(11) | 12.56654(10)   | 12.61533(15) | 380.857(6)              |             | 380.823(7)             |           |                               |          |
| Atom           | Site       | $x$            |             | $y$            |              | $z$                     |             | Occupancy <sup>a</sup> |           | $B_{\text{iso}}/\text{\AA}^2$ |          |
|                |            | HT             |             | HT             |              | HT                      |             | HT                     |           | HT                            |          |
|                |            | CO             | CA          | CO             | CA           | CO                      | CA          | CO                     | CA        | CO                            | CA       |
| Fe1            | 8 <i>f</i> | 0              |             | 0.26614(10)    |              | 0.11098(7)              |             | 1                      |           | 1.18(2)                       |          |
|                |            | 0              | 0           | 0.26496(20)    | 0.26688(27)  | 0.11038(13)             | 0.11125(17) | 1                      | 1         | 0.54(4)                       | 0.56(6)  |
| Fe2            | 4 <i>a</i> | 0              |             | 0              |              | 0                       |             | 1                      |           | 1.35(3)                       |          |
|                |            | 0              | 0           | 0              | 0            | 0                       | 0           | 1                      | 1         | 0.71(5)                       | 0.49(6)  |
| Ca1/Fe         | 4 <i>c</i> | 0              |             | 0.52025(29)    |              | ¼                       |             | 0.952(8)/0.040(8)      |           | 1.49(5)                       |          |
|                |            | 0              | 0           | 0.52008(52)    | 0.51938(72)  | ¼                       | ¼           | 0.952(8)/              | 0.952(8)/ | 0.60(9)                       | 0.86(12) |
| O1             | 4 <i>c</i> | 0              |             | 0.19199(20)    |              | ¼                       |             | 1                      |           | 1.23(4)                       |          |
|                |            | 0              | 0           | 0.19241(44)    | 0.19135(64)  | ¼                       | ¼           | 1                      | 1         | 0.51(8)                       | 1.03(11) |
| O2             | 8 <i>f</i> | 0              |             | 0.64375(19)    |              | 0.44928(13)             |             | 1                      |           | 1.62(3)                       |          |
|                |            | 0              | 0           | 0.65048(32)    | 0.64088(56)  | 0.44839(23)             | 0.44849(30) | 1                      | 1         | 0.65(5)                       | 1.17(8)  |
| O3             | 8 <i>f</i> | 0              |             | 0.90437(19)    |              | 0.13509(11)             |             | 1                      |           | 1.29(3)                       |          |
|                |            | 0              | 0           | 0.90340(40)    | 0.90383(59)  | 0.13570(19)             | 0.13566(28) | 1                      | 1         | 0.62(6)                       | 0.96(7)  |

<sup>a</sup> Variable occupancies were refined against 500 K neutron data and were fixed in lower temperature refinements. The refined Ca1/Fe occupancy from synchrotron X-ray diffraction data at 500 K is 0.956(3)/0.044(3).

**Supplementary Table 2.** Fe-O and Fe-Fe bond lengths (Å) obtained from powder neutron diffraction data, with mean values  $\langle \rangle$ , shown for the HT phase of CaFe<sub>3</sub>O<sub>5</sub> at 500 K (upper values) and the CO and CA phases at 4 K (lower values).

| Bond         | Distance |          | Bond             | Distance |          |
|--------------|----------|----------|------------------|----------|----------|
|              | CO       | HT CA    |                  | CO       | HT CA    |
| Ca1-O1 (x 2) | 2.295(3) |          | <Fe1-O>          | 2.083(1) |          |
|              | 2.296(5) | 2.288(7) |                  | 2.055(1) | 2.082(2) |
| Ca1-O3 (x 4) | 2.403(2) |          | Fe2-O2 (x 4)     | 2.190(1) |          |
|              | 2.296(5) | 2.288(7) |                  | 2.231(3) | 2.165(5) |
| <Ca1-O>      | 2.367(2) |          | Fe2-O3 (x 2)     | 1.961(2) |          |
|              | 2.359(4) | 2.354(6) |                  | 1.961(3) | 1.962(5) |
| Fe1-O1       | 1.912(1) |          | <Fe2-O>          | 2.113(1) |          |
|              | 1.899(3) | 1.907(4) |                  | 2.141(1) | 2.097(2) |
| Fe1-O2       | 2.239(2) |          | Fe1-Fe1, Fe2-Fe2 | 3.039(1) |          |
|              | 2.205(4) | 2.251(5) |                  | 3.024(1) | 3.019(1) |
| Fe1-O2 (x 2) | 2.096(2) |          | Fe2-Fe2(x 2)     | 3.213(2) |          |
|              | 2.037(3) | 2.106(5) |                  | 3.173(3) | 3.205(4) |
| Fe1-O3 (x 2) | 2.078(2) |          | Fe1-Fe2(x 4)     | 3.126(1) |          |
|              | 2.077(4) | 2.061(5) |                  | 3.124(2) | 3.111(3) |

**Supplementary Table 3.** Irreducible representations (IrReps) and basis vectors (BV) for Fe1 and Fe2 spin order in the CO phase of CaFe<sub>3</sub>O<sub>5</sub> at 4 K, with propagation vector ( $\frac{1}{2}$  0 0). The magnetically independent atoms are Fe1 at ( $\frac{1}{2}$ , 0.2650, 0.1104) and Fe2 at (0, 0, 0). The symmetry related positions are generated by the operators 1: (x, y, z), 2: (x, y, -z+ $\frac{1}{2}$ ), 3: (x, -y, z+ $\frac{1}{2}$ ) and 4: (x, -y, -z). The structure was solved using  $\Gamma_2\psi_4$ ,  $\Gamma_2\psi_5$  and  $\Gamma_2\psi_6$  for Fe1 and  $\Gamma_2\psi_4$ ,  $\Gamma_4\psi_{11}$  and  $\Gamma_4\psi_{12}$  for Fe2, with  $R_p$  and  $R_{wp}$  factors = 6.1 and 7.3 %, respectively.

| IrReps | $\Gamma_1$ |          |          | $\Gamma_2$ |          |          | $\Gamma_3$ |          |          | $\Gamma_4$  |             |             |
|--------|------------|----------|----------|------------|----------|----------|------------|----------|----------|-------------|-------------|-------------|
| BV     | $\psi_1$   | $\psi_2$ | $\psi_3$ | $\psi_4$   | $\psi_5$ | $\psi_6$ | $\psi_7$   | $\psi_8$ | $\psi_9$ | $\psi_{10}$ | $\psi_{11}$ | $\psi_{12}$ |
| Atoms  | $m_x$      | $m_y$    | $m_z$    | $m_x$      | $m_y$    | $m_z$    | $m_x$      | $m_y$    | $m_z$    | $m_x$       | $m_y$       | $m_z$       |
| Fe1_1  | +          | +        | +        | +          | +        | +        | +          | +        | +        | +           | +           | +           |
| Fe1_2  | +          | -        | -        | +          | -        | -        | -          | +        | +        | -           | +           | +           |
| Fe1_3  | -          | -        | +        | +          | +        | -        | -          | -        | +        | +           | +           | -           |
| Fe1_4  | -          | +        | -        | +          | -        | +        | +          | -        | +        | -           | +           | -           |
| Fe2_1  | +          |          |          | +          |          |          |            | +        | +        |             | +           | +           |
| Fe2_2  | -          |          |          | +          |          |          |            | -        | +        |             | +           | -           |

**Supplementary Table 4.** Irreducible representations (IrReps) and basis vectors (BV) for Fe1 and Fe2 spin order in the CA phase of  $\text{CaFe}_3\text{O}_5$  at 4 K, with propagation vector (0 0 0). The magnetically independent atoms are Fe1 at (0, 0.2669, 0.1113) and Fe2 at (0, 0, 0). The symmetry related positions are generated by the operators 1: (x, y, z), 2: (-x, -y, z+1/2), 3: (-x, y, -z+1/2) and 4: (x, -y, -z). The structure was solved using  $\Gamma_1\psi_1$ ,  $\Gamma_5\psi_7$  and  $\Gamma_5\psi_8$  for both Fe1 and Fe2 sites, with  $R_p$  and  $R_{wp}$  factors = 6.1 and 7.3 %, respectively.

| IrReps | $\Gamma_1$ | $\Gamma_2$ |          | $\Gamma_3$ |          | $\Gamma_4$ | $\Gamma_5$ |          | $\Gamma_6$ | $\Gamma_7$  | $\Gamma_8$  |             |
|--------|------------|------------|----------|------------|----------|------------|------------|----------|------------|-------------|-------------|-------------|
| BV     | $\psi_1$   | $\psi_2$   | $\psi_3$ | $\psi_4$   | $\psi_5$ | $\psi_6$   | $\psi_7$   | $\psi_8$ | $\psi_9$   | $\psi_{10}$ | $\psi_{11}$ | $\psi_{12}$ |
| Atoms  | $m_x$      | $m_y$      | $m_z$    | $m_y$      | $m_z$    | $m_x$      | $m_y$      | $m_z$    | $m_x$      | $m_x$       | $m_y$       | $m_z$       |
| Fe1_1  | +          | +          | +        | +          | +        | +          | +          | +        | +          | +           | +           | +           |
| Fe1_2  | -          | -          | +        | -          | +        | -          | +          | -        | +          | +           | +           | -           |
| Fe1_3  | -          | +          | -        | -          | +        | +          | +          | -        | -          | +           | -           | +           |
| Fe1_4  | +          | -          | -        | +          | +        | -          | +          | +        | -          | +           | -           | -           |
| Fe2_1  | +          |            |          | +          | +        |            | +          | +        |            | +           |             |             |
| Fe2_2  | -          |            |          | -          | +        |            | +          | -        |            | +           |             |             |

**Supplementary Table 5.** The refined Fe moments in the CO and CA phases of  $\text{CaFe}_3\text{O}_5$  between 4 and 300 K. Moments of the Fe1 and Fe2 sites were constrained to be equal.

| Sites       | Phases | 4 K     | 50 K    | 100 K   | 150 K   | 200 K   | 250 K   | 275 K   | 300 K |
|-------------|--------|---------|---------|---------|---------|---------|---------|---------|-------|
| Fe1/2       | CO     | 4.03(3) | 3.98(3) | 3.85(3) | 3.70(3) | 3.39(3) | 2.86(4) | 2.30(4) | 0     |
| ( $\mu_B$ ) | CA     | 3.63(4) | 3.68(4) | 3.60(4) | 3.40(4) | 3.28(3) | 3.02(3) | 2.66(3) | 0     |

**Supplementary Table 6.** Bader charge and volume, Mulliken charge and spin, and total energies of the CO and CA phases of  $\text{CaFe}_3\text{O}_5$  from band structure calculations with  $U = 3.4$  eV. Differences between Bader and Mulliken quantities are in keeping with the greater charge separation between Fe1 and Fe2 sites in the CO phase compared to the CA found by BVS calculations as shown in Fig. 4b although magnitudes are smaller than expected from the formal valences.<sup>1</sup>

|                                            | Charge Ordered (CO) |      | Charge averaged (CA) |      |
|--------------------------------------------|---------------------|------|----------------------|------|
|                                            | Fe1                 | Fe2  | Fe1                  | Fe2  |
| Bader Charge                               | 1.85                | 1.51 | 1.83                 | 1.55 |
| Bader Volume ([bohr radius] <sup>3</sup> ) | 50                  | 59   | 52                   | 56   |
| Mulliken Charge                            | 1.04                | 0.86 | 1.01                 | 0.91 |
| Mulliken Spin ( $\mu_B$ )                  | 4.08                | 3.72 | 4.07                 | 3.65 |
| Total energy (eV)                          | -46328.588          |      | -46327.893           |      |
| Free energy (E – TS) (eV)                  | -46328.858          |      | -46328.048           |      |

### Supplementary References

1. Pickett, W. E., Quan, Y. & Pardo, V. Charge states of ions, and mechanisms of charge ordering transitions. *J. Phys.: Condens. Matter* **26**, 274203 (2014).
